# Supplementary material for: Anion binding, electrochemistry and solvatochromism of β-brominated oxoporphyrinogens
Source: Royal Society of Chemistry journal article supplement (doi:10.1039/c5dt04258e), 2016-01-01
Supplement: c5dt04258e1.pdf [file c5dt04258e1.pdf]

## Supporting Information

### Anion Binding, Electrochemistry and Solvatochromism of $\beta$ -Pyrrole Brominated Oxoporphyrinogens

*Whitney A. Webre,<sup>1</sup> Jonathan P. Hill,<sup>\*2</sup> Yoshitaka Matsushita,<sup>3</sup> Paul A. Karr,<sup>4</sup> Katsuhiko Ariga<sup>2</sup> and Francis D'Souza<sup>\*1</sup>*

<sup>1</sup>*Department of Chemistry, University of North Texas, 1155 Union Circle, #305070, Denton, Texas 76203, USA. Tel: +940-369-8832; Fax: +940-565-4318; E-mail: Francis.Dsouza@unt.edu*

<sup>2</sup>*WPI Center for Materials Nanoarchitectonics, National Institute for Materials Science (NIMS), Namiki 1-1, Tsukuba, Ibaraki 305-0044, Japan. Tel: +81298604399; Fax: +81298604832; E-mail: Jonathan.Hill@nims.go.jp*

<sup>3</sup>*Research Network and Facility Services Division, National Institute for Materials Science (NIMS), 1-2-1 Sengen, Tsukuba, Ibaraki 305-0047, Japan.*

<sup>4</sup>*Department of Physical Sciences and Mathematics, Wayne State College, 111 Main Street, Wayne, Nebraska, 68787, USA*

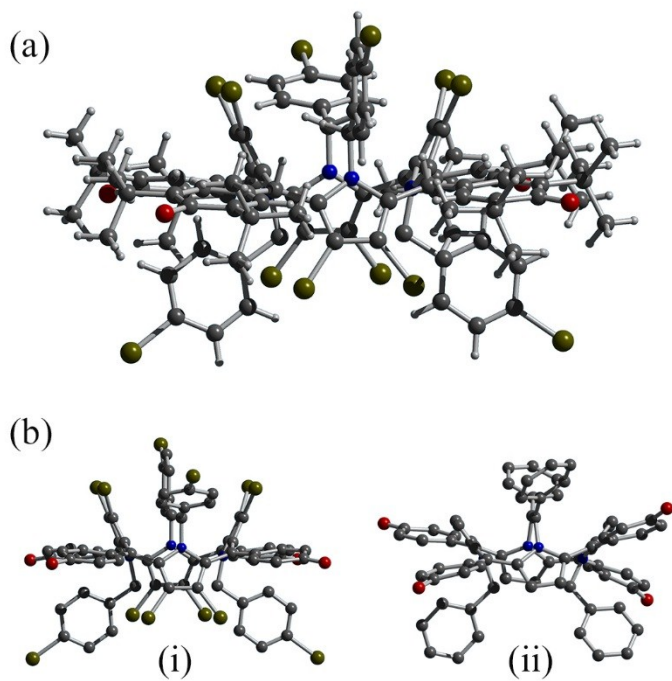

**Figure S1.** (a) X-ray crystal structure of  $\beta$ -Br<sub>8</sub>OxPBz<sub>4</sub>. (b) Comparison of the crystal structures of  $\beta$ -Br<sub>8</sub>OxPBz<sub>4</sub> and its non-brominated analogue revealing higher symmetry of the former.

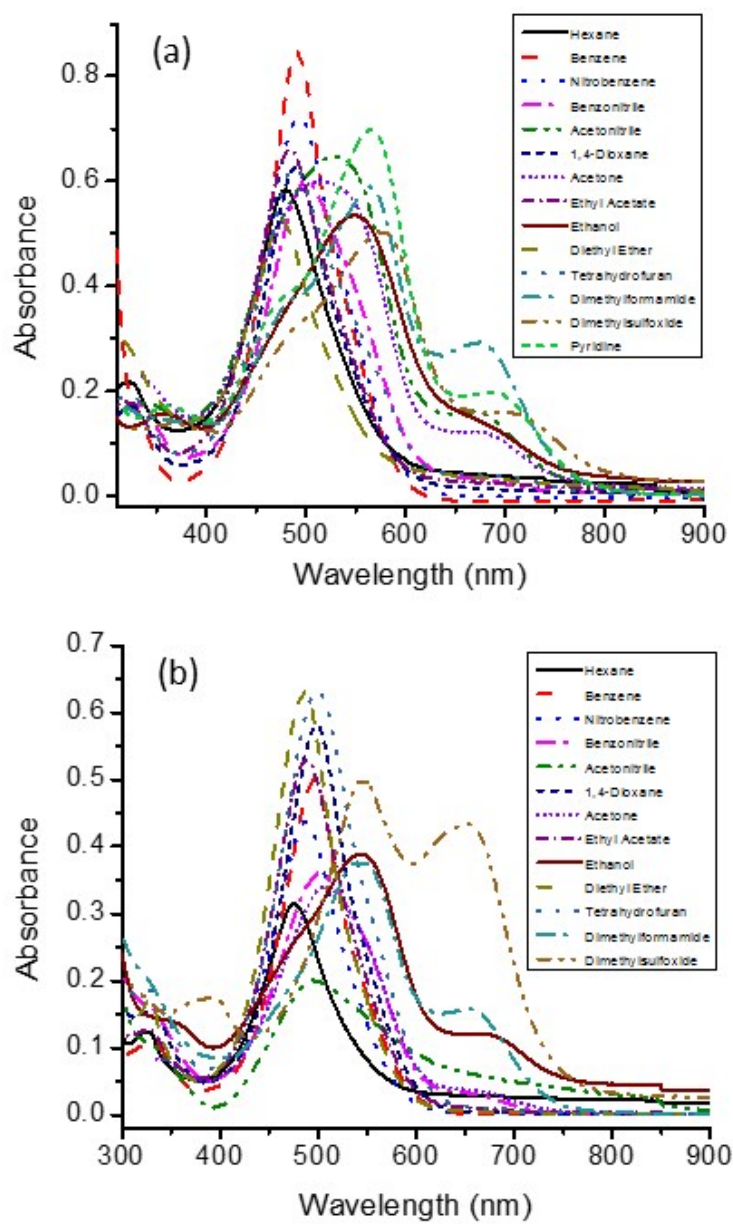

**Figure S2.** Absorption spectra of (a)  $\beta$ -Br<sub>8</sub>OxP and (b)  $\beta$ -Br<sub>8</sub>OxPBz<sub>2</sub> in different solvents.

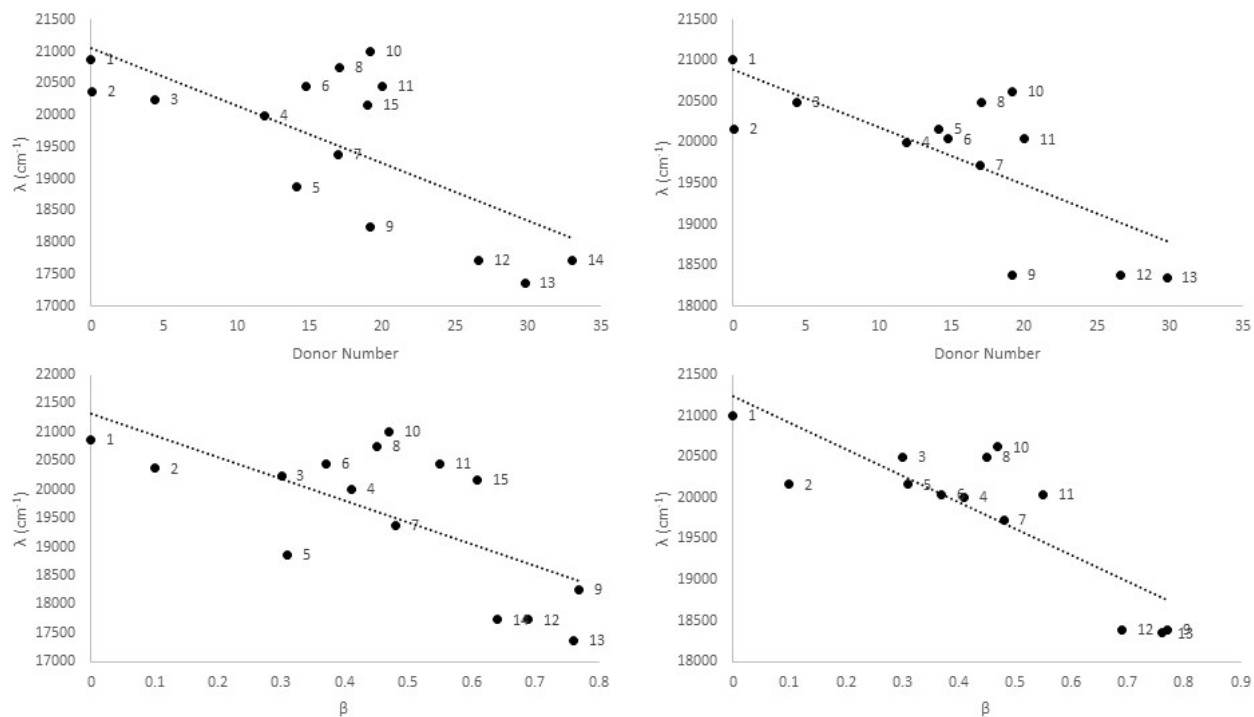

**Figure S3.** Plots of absorption peak maxima vs. donor number versus (a and b), and absorption peak maxima vs.  $\beta$  versus (c and d) for  $\beta\text{-Br}_8\text{OxP}$  (plots a and c) and  $\beta\text{-Br}_8\text{OxPBz}_2$  (plots b and d); Solvents: 1(hexane); 2(benzene); 3(nitrobenzene); 4(benzonitrile); 5(acetonitrile); 6(1,4-Dioxane); 7(acetone); 8(ethyl acetate); 9(ethanol); 10(diethyl ether); 11(tetrahydrofuran); 12(dimethylformamide); 13(dimethylsulfoxide); 14(pyridine).

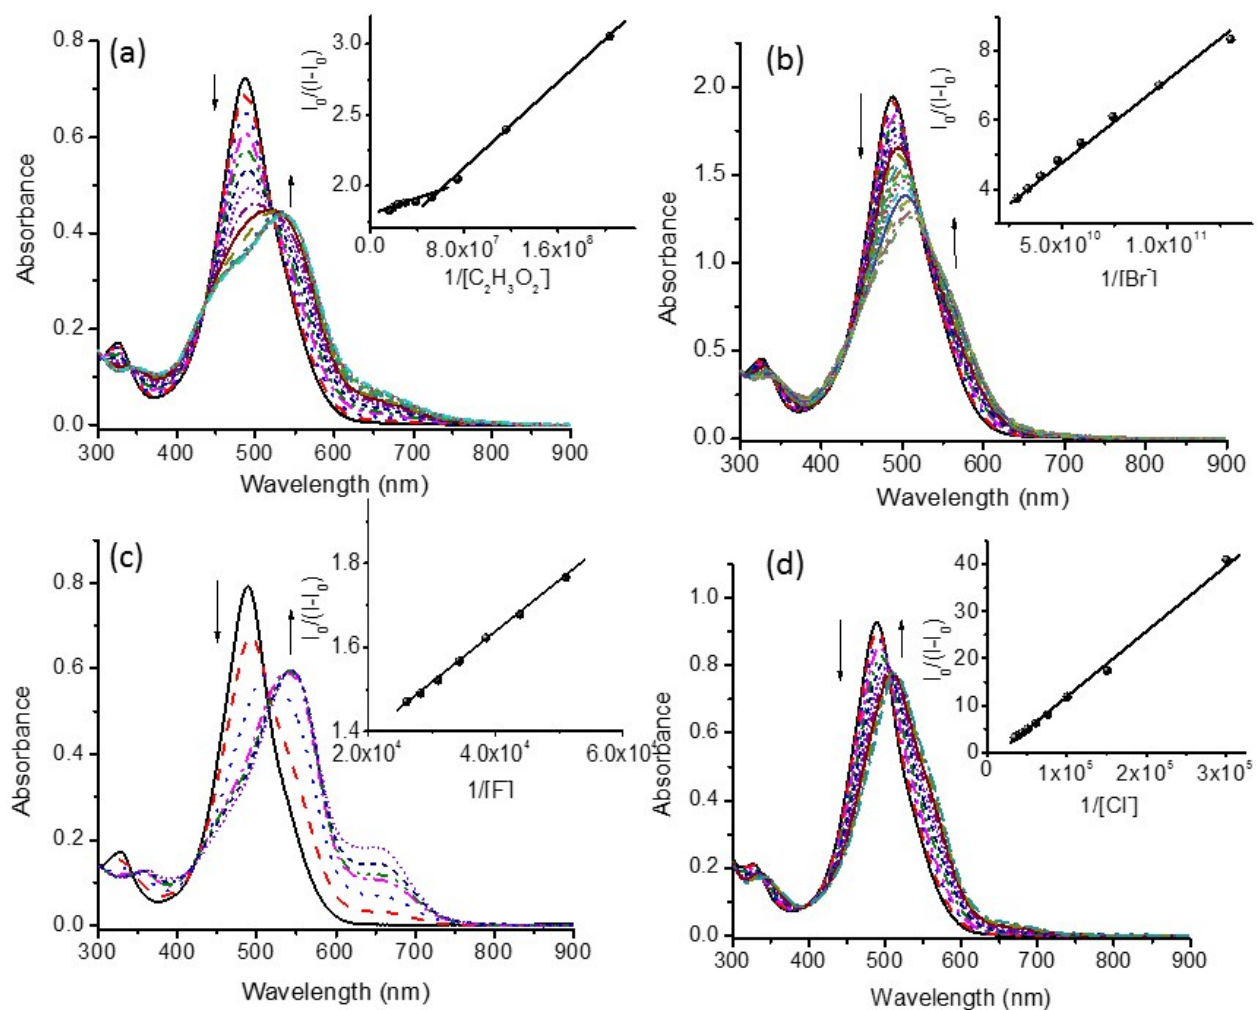

**Figure S4.** Spectral changes observed for (a)  $\beta$ -Br<sub>8</sub>OxP during increased addition of acetate, (b)  $\beta$ -Br<sub>8</sub>OxP during increased addition of bromide, (c)  $\beta$ -Br<sub>8</sub>OxPBz<sub>2</sub> during increased addition of fluoride and (d)  $\beta$ -Br<sub>8</sub>OxPBz<sub>2</sub> during increased addition of chloride in benzonitrile. Figure inset shows Benesi-Hildebrand plots constructed to obtain binding constants.

**Table S1.** Donor Numbers and  $\beta$  Values and Optical Absorption Spectral Data for  $\beta$ -Br<sub>8</sub>OxP and  $\beta$ -Br<sub>8</sub>OxPBz<sub>2</sub> in different solvents.

| Solvent           | Donor Number | $\beta$ | $\beta$ -Br <sub>8</sub> OxP | $\beta$ -Br <sub>8</sub> OxPBz <sub>2</sub> |
|-------------------|--------------|---------|------------------------------|---------------------------------------------|
| Hexane            | 0.0          | 0.00    | 323, 480                     | 326, 475                                    |
| Benzene           | 0.1          | 0.10    | 330, 492                     | 333, 496                                    |
| Nitrobenzene      | 4.4          | 0.30    | 493                          | 488                                         |
| Benzonitrile      | 11.9         | 0.41    | 333, 500                     | 330(sh), 501, 661                           |
| Acetonitrile      | 14.1         | 0.31    | 338, 530, 674(sh)            | 331, 494                                    |
| 1,4-Dioxane       | 14.8         | 0.37    | 326, 489                     | 333, 499, 665                               |
| Acetone           | 17.0         | 0.48    | 514, 679(sh)                 | 342(sh), 509, 665(sh)                       |
| Ethyl Acetate     | 17.1         | 0.45    | 323, 484                     | 329(sh), 487                                |
| Ethanol           | 19.2         | 0.77    | 359, 551, 667(sh)            | 356(sh), 542, 676(sh)                       |
| Diethyl Ether     | 19.2         | 0.47    | 321(sh), 476                 | 329, 486                                    |
| Tetrahydrofuran   | 20.0         | 0.55    | 325, 489, 696(sh)            | 328, 501                                    |
| Dimethylformamide | 26.6         | 0.69    | 486(sh), 564, 673(sh)        | 543, 660(sh)                                |
| Dimethylsulfoxide | 29.8         | 0.76    | 365, 494(sh), 575, 711(sh)   | 393, 544, 654                               |
| Pyridine          | 33.1         | 0.64    | 360, 475(sh), 566, 693(sh)   |                                             |

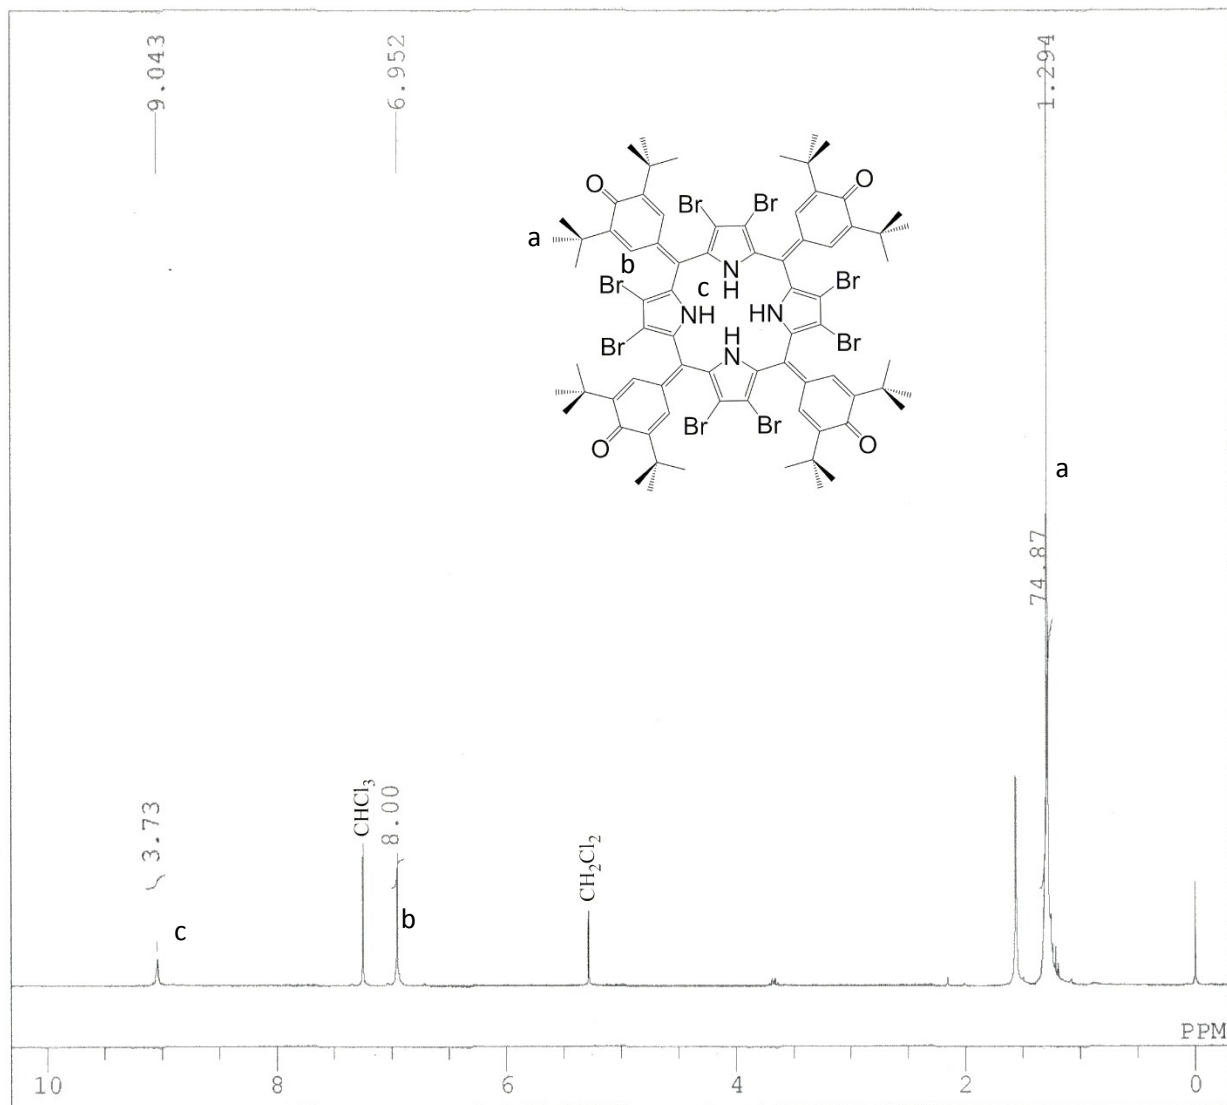

**Figure S5.**  $^1\text{H}$  NMR spectrum of  $\beta\text{-Br}_8\text{OxP}$ .

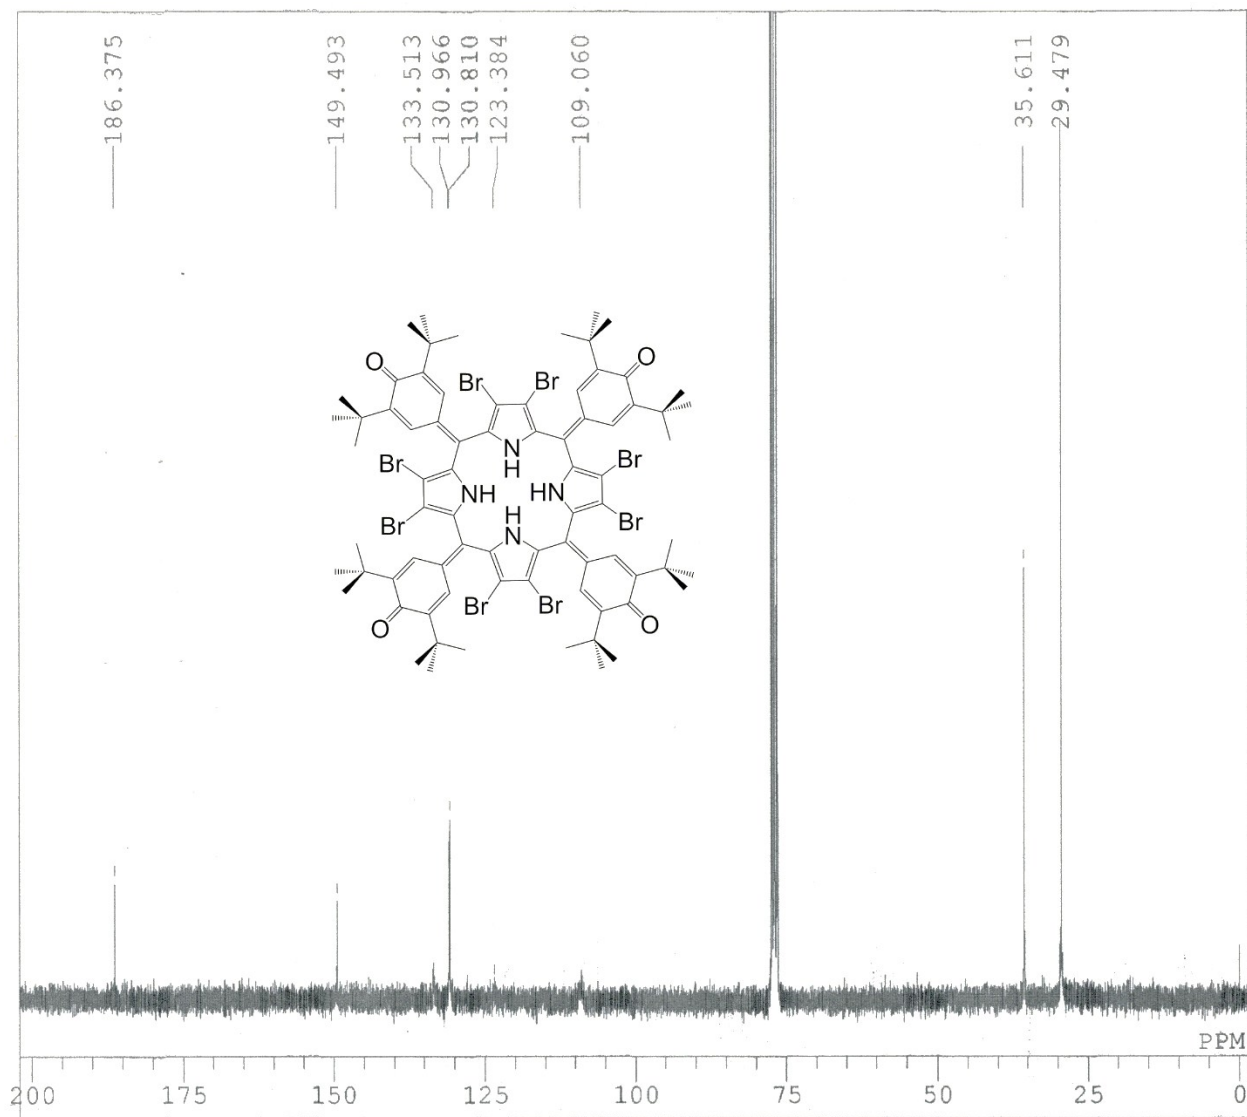

**Figure S6.** <sup>13</sup>C NMR spectrum of β-Br<sub>8</sub>OxP.



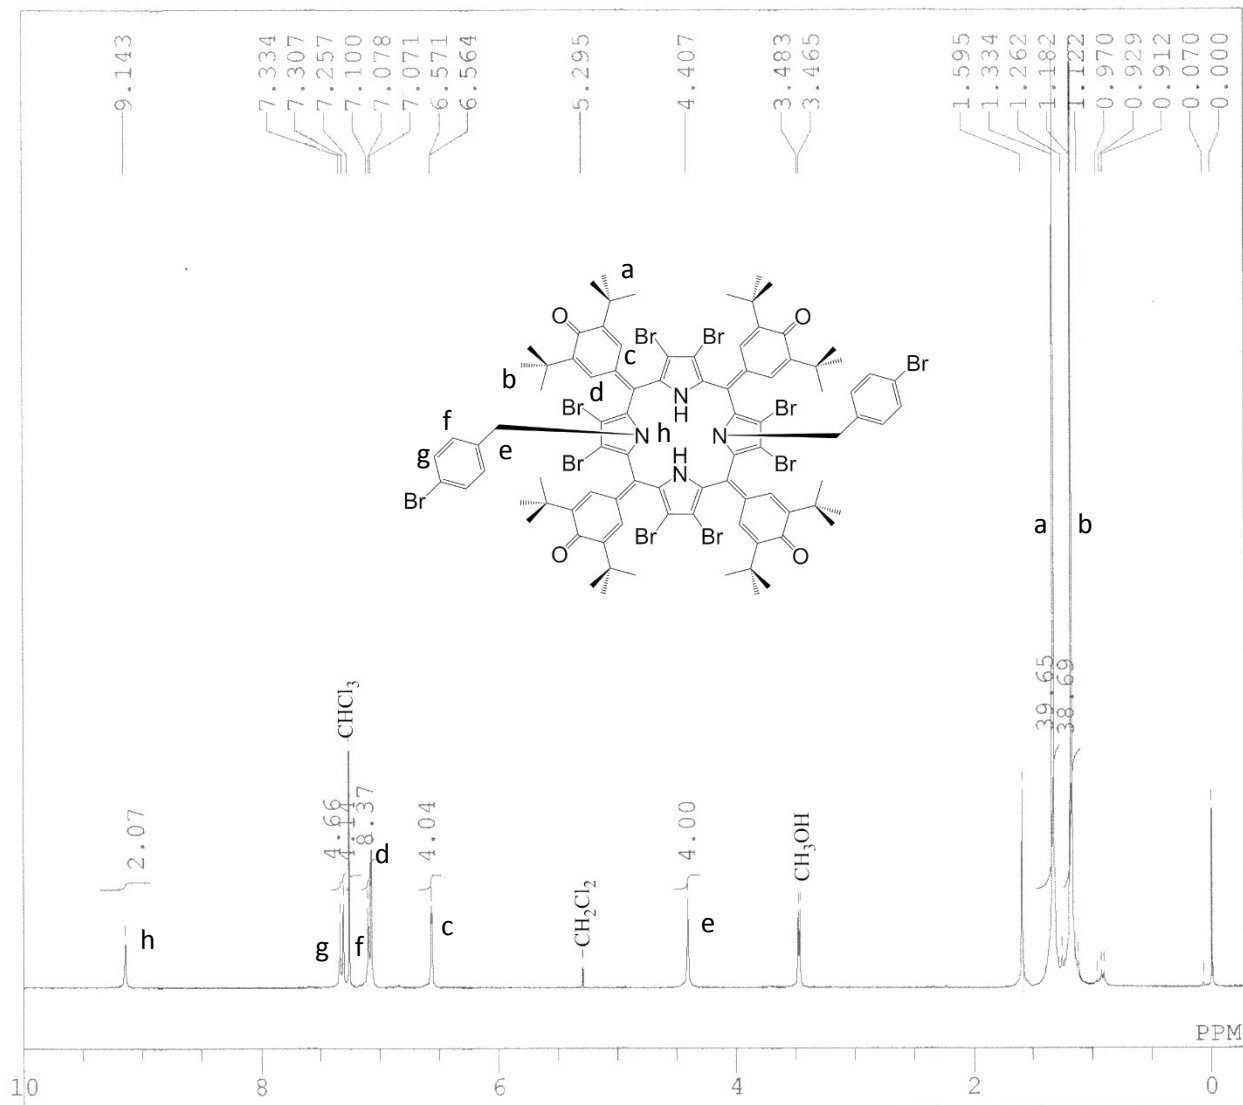

**Figure S7.** <sup>1</sup>H NMR spectrum of  $\beta$ -Br<sub>8</sub>OxPBz<sub>2</sub>

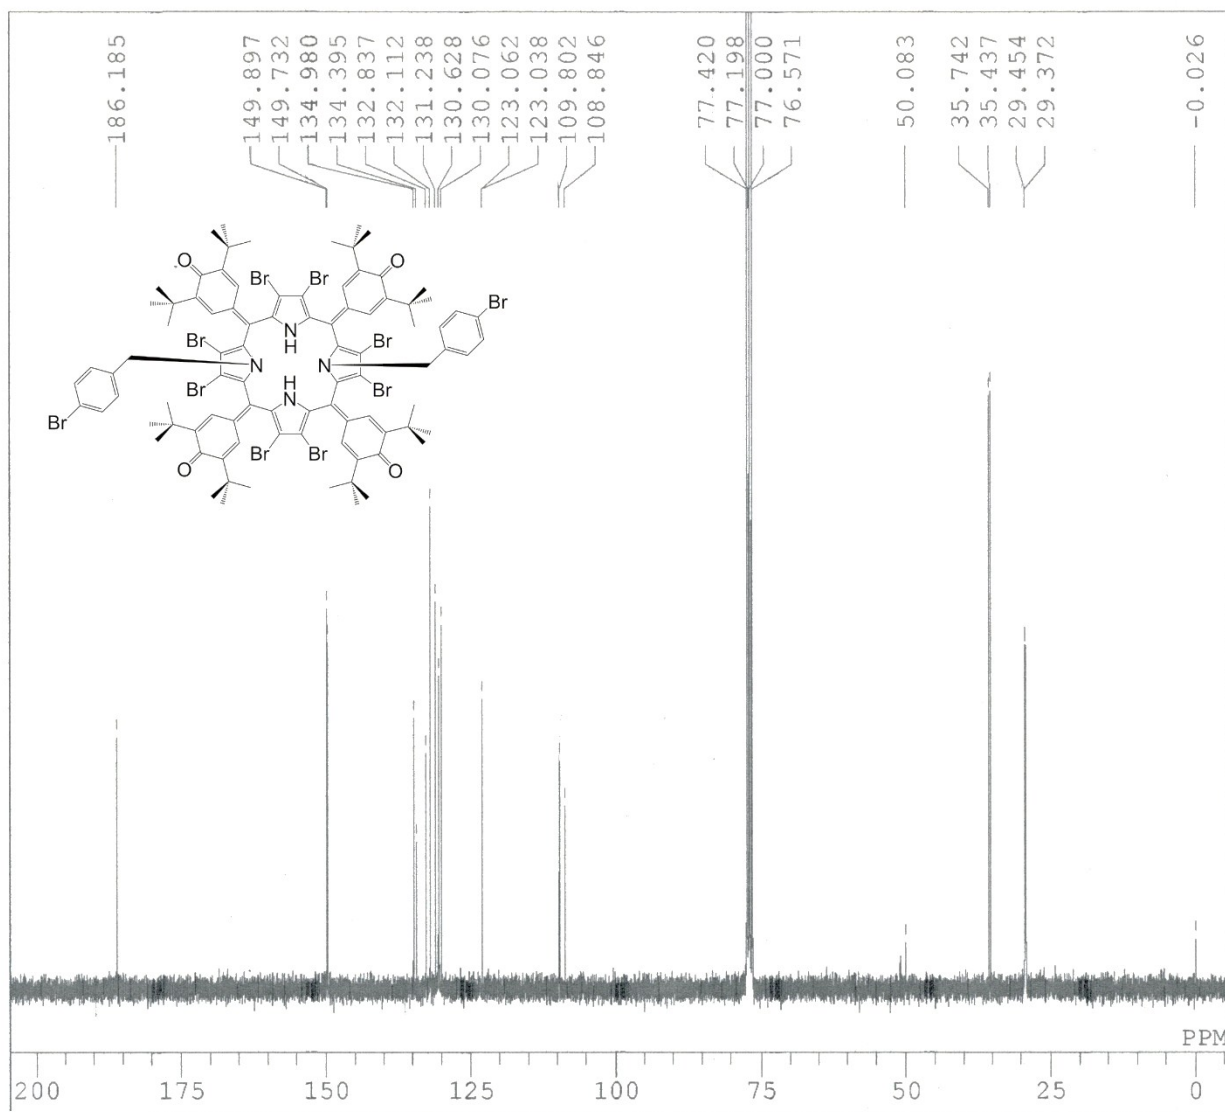

**Figure S8.** <sup>13</sup>C NMR spectrum of β-Br<sub>8</sub>OxPBz<sub>2</sub>

## Total energy and computed coordinates of brominated OxP derivatives

### (a) Br<sub>8</sub>OxP

Total Energy: -23003.60877555 A.U.

|   |             |             |             |
|---|-------------|-------------|-------------|
| C | 2.65411410  | -2.28992468 | -0.00802488 |
| C | 2.28993121  | 2.65410735  | 0.00798512  |
| C | -2.65411487 | 2.28992600  | -0.00792488 |
| C | -2.28992572 | -2.65411382 | 0.00797512  |
| N | 0.17507557  | -2.36472518 | 0.15840513  |
| C | 1.33957521  | -2.60893154 | -0.55908493 |
| C | -0.94585639 | -2.77766144 | -0.55093493 |
| C | 0.93111576  | -3.12859250 | -1.78812502 |
| C | -0.47429990 | -3.23251398 | -1.78294502 |
| C | 2.77766798  | -0.94586316 | 0.55088516  |
| C | -2.60891853 | -1.33957648 | 0.55906516  |
| C | -3.19219670 | -3.70272064 | 0.01309512  |
| C | 3.70272092  | -3.19219566 | -0.01316488 |
| N | 2.36471766  | 0.17507036  | -0.15844490 |
| C | 3.23254863  | -0.47430976 | 1.78288525  |
| N | -2.36471842 | -0.17506903 | -0.15840490 |
| C | -3.12857633 | -0.93115295 | 1.78810525  |
| C | -4.60117543 | -3.48634354 | 0.30599514  |
| C | -2.76880350 | -5.06497137 | -0.27484490 |
| C | 5.06498100  | -2.76878215 | 0.27474514  |
| C | 3.48636568  | -4.60116968 | -0.30607491 |
| C | 3.12861309  | 0.93110745  | 1.78806525  |
| C | 2.60893807  | 1.33956845  | 0.55904516  |
| C | -3.23250407 | 0.47427052  | 1.78295525  |

|   |             |             |             |
|---|-------------|-------------|-------------|
| C | -2.77765624 | 0.94584887  | 0.55095516  |
| C | -5.49739616 | -4.49807728 | 0.30515514  |
| C | -3.63503432 | -6.10240626 | -0.26469490 |
| C | 6.10243150  | -3.63500046 | 0.26457514  |
| C | 4.49811502  | -5.49737791 | -0.30525491 |
| C | -5.07131871 | -5.88759993 | 0.02295512  |
| C | 5.88763925  | -5.07128640 | -0.02308489 |
| C | -6.96803313 | -4.31217187 | 0.56643516  |
| C | -3.23223205 | -7.52998318 | -0.52047492 |
| C | 7.52999746  | -3.23216852 | 0.52032516  |
| C | 4.31223148  | -6.96801017 | -0.56653492 |
| C | 0.94584783  | 2.77765652  | -0.55090493 |
| C | -1.33958377 | 2.60892661  | -0.55901492 |
| O | -5.88679982 | -6.83580883 | 0.02719512  |
| C | 3.19218813  | 3.70271571  | 0.01310512  |
| C | -3.70271543 | 3.19218918  | -0.01302488 |
| O | 6.83585746  | -5.88674716 | -0.02735489 |
| C | 0.47427257  | 3.23253246  | -1.78289502 |
| N | -0.17507163 | 2.36470464  | 0.15845513  |
| C | -0.93115089 | 3.12860473  | -1.78804502 |
| C | 4.60117621  | 3.48635892  | 0.30597514  |
| C | 2.76876682  | 5.06496954  | -0.27479490 |
| C | -3.48634458 | 4.60117571  | -0.30590491 |
| C | -5.06497396 | 2.76878972  | 0.27490514  |
| C | 5.49738447  | 4.49810827  | 0.30513514  |
| C | 3.63497888  | 6.10242785  | -0.26465490 |
| C | -6.10241039 | 3.63500649  | 0.26478514  |
| C | -4.49808613 | 5.49739018  | -0.30504491 |
| C | 5.07127888  | 5.88763401  | 0.02297512  |
| C | -5.88761660 | 5.07130649  | -0.02285489 |
| C | 6.96802292  | 4.31221691  | 0.56637516  |

|    |             |             |             |
|----|-------------|-------------|-------------|
| C  | 3.23213914  | 7.52998751  | -0.52039492 |
| C  | -4.31218697 | 6.96803493  | -0.56629493 |
| C  | -7.52997481 | 3.23218861  | 0.52055516  |
| O  | 5.88674748  | 6.83585852  | 0.02721512  |
| O  | -6.83581920 | 5.88677976  | -0.02707489 |
| Br | -2.05264390 | 3.53220880  | -3.26080513 |
| Br | 1.53520883  | 3.79867292  | -3.24699513 |
| Br | -3.79861796 | 1.53518962  | 3.24707536  |
| Br | -3.53215229 | -2.05264905 | 3.26086537  |
| Br | -1.53525492 | -3.79863103 | -3.24704513 |
| Br | 2.05257750  | -3.53215755 | -3.26091513 |
| Br | 3.53220781  | 2.05258015  | 3.26084536  |
| Br | 3.79868754  | -1.53526007 | 3.24697536  |
| H  | -4.92435308 | -2.46978784 | 0.49298515  |
| H  | -1.71623530 | -5.23337348 | -0.46611492 |
| H  | 5.23337686  | -1.71620613 | 0.46601515  |
| H  | 2.46980843  | -4.92436139 | -0.49304492 |
| H  | 1.71618926  | 5.23335134  | -0.46604492 |
| H  | 4.92436792  | 2.46980167  | 0.49293515  |
| H  | -2.46979513 | 4.92436116  | -0.49288492 |
| H  | -5.23336357 | 1.71620591  | 0.46615515  |
| H  | -2.16063480 | -7.61257663 | -0.71879494 |
| H  | -3.78877201 | -7.92825208 | -1.37662499 |
| H  | -3.49034837 | -8.15586979 | 0.34136514  |
| H  | -7.20982290 | -3.26357073 | 0.75720518  |
| H  | -7.27398156 | -4.91500708 | 1.42920523  |
| H  | -7.55215269 | -4.66875009 | -0.28956491 |
| H  | 4.66883781  | -7.55213284 | 0.28944514  |
| H  | 3.26362724  | -7.20982803 | -0.75729494 |
| H  | 4.91505263  | -7.27395706 | -1.42932500 |
| H  | 8.15588249  | -3.49029890 | -0.34151491 |

|   |             |             |             |
|---|-------------|-------------|-------------|
| H | 7.61258314  | -2.16057753 | 0.71862517  |
| H | 7.92828198  | -3.78869597 | 1.37647522  |
| H | 7.27400887  | 4.91506933  | 1.42912523  |
| H | 7.20983459  | 3.26362048  | 0.75716518  |
| H | 7.55211914  | 4.66877637  | -0.28964491 |
| H | 3.78866189  | 7.92829394  | -1.37653499 |
| H | 2.16053879  | 7.61255292  | -0.71870494 |
| H | 3.49023985  | 8.15586164  | 0.34145514  |
| H | -3.26359834 | 7.20984031  | -0.75708494 |
| H | -4.66874643 | 7.55213115  | 0.28972514  |
| H | -4.91504719 | 7.27401458  | -1.42903499 |
| H | -7.61255425 | 2.16058981  | 0.71885517  |
| H | -8.15586767 | 3.49031273  | -0.34128491 |
| H | -7.92824525 | 3.78871451  | 1.37671522  |
| H | -0.15632095 | 2.06137002  | 1.12686520  |
| H | 0.15635145  | -2.06140771 | 1.12681520  |
| H | 2.06137833  | 0.15634154  | -1.12685497 |
| H | -2.06139160 | -0.15632461 | -1.12682497 |

**(b) Br<sub>8</sub>OxPBz<sub>2</sub>**

Total Energy: -28663.78092458 A.U.

|   |             |             |             |
|---|-------------|-------------|-------------|
| C | 2.51373349  | 2.47054931  | 0.50998626  |
| C | -2.51379023 | 2.47070459  | 0.50992626  |
| C | -2.51373349 | -2.47054931 | 0.50998626  |
| C | 2.51379023  | -2.47070459 | 0.50992626  |
| N | 2.38914175  | -0.00008527 | 0.63309627  |
| C | 2.82688842  | 1.14686797  | -0.01515378 |
| C | 2.82698580  | -1.14701393 | -0.01515378 |

|   |             |             |             |
|---|-------------|-------------|-------------|
| C | 3.50719510  | 0.70388313  | -1.15254387 |
| C | 3.50727026  | -0.70395805 | -1.15253387 |
| C | 1.14201097  | 2.63844157  | 1.00742630  |
| C | 1.14207066  | -2.63857260 | 1.00739630  |
| C | 3.45600476  | -3.47378958 | 0.64222627  |
| C | 3.45598037  | 3.47360584  | 0.64233627  |
| N | -0.00002985 | 2.46092194  | 0.22254624  |
| C | 0.70339383  | 2.88639044  | 2.30542640  |
| N | 0.00002985  | -2.46092194 | 0.22254624  |
| C | 0.70345712  | -2.88650411 | 2.30540640  |
| C | 3.05338227  | -4.83710451 | 0.95913629  |
| C | 4.87989516  | -3.21224319 | 0.49120626  |
| C | 3.05338227  | 4.83694299  | 0.95919629  |
| C | 4.87985222  | 3.21208185  | 0.49107626  |
| C | -0.70345712 | 2.88650411  | 2.30540640  |
| C | -1.14207066 | 2.63857260  | 1.00739630  |
| C | -0.70339383 | -2.88639044 | 2.30542640  |
| C | -1.14201097 | -2.63844157 | 1.00742630  |
| C | -0.00018031 | 2.41825209  | -1.27060388 |
| C | 0.00018031  | -2.41825209 | -1.27060388 |
| C | 3.95164820  | -5.83898754 | 1.08513630  |
| C | 5.80555327  | -4.18691858 | 0.63013627  |
| C | 3.95162787  | 5.83893155  | 1.08455630  |
| C | 5.80548565  | 4.18685800  | 0.62942627  |
| C | 5.40094456  | -5.58087118 | 0.92635629  |
| C | 5.40086381  | 5.58086758  | 0.92524629  |
| C | -0.00004757 | 3.80740301  | -1.89161392 |
| C | 0.00004757  | -3.80740301 | -1.89161392 |
| C | 3.57564920  | -7.26701399 | 1.37626632  |
| C | 7.28850208  | -3.95212205 | 0.52406626  |

|   |             |             |             |
|---|-------------|-------------|-------------|
| C | 3.57564635  | 7.26701727  | 1.37537633  |
| C | 7.28841921  | 3.95213418  | 0.52298626  |
| C | -2.82698580 | 1.14701393  | -0.01515378 |
| C | -2.82688842 | -1.14686797 | -0.01515378 |
| O | 6.24582377  | -6.49537101 | 1.04202630  |
| C | -3.45600476 | 3.47378958  | 0.64222627  |
| C | -3.45598037 | -3.47360584 | 0.64233627  |
| O | 6.24569608  | 6.49548923  | 1.04025630  |
| C | 1.20591399  | 4.45906741  | -2.17934394 |
| C | -1.20592880 | 4.45828952  | -2.18143395 |
| C | 1.20592880  | -4.45828952 | -2.18143395 |
| C | -1.20591399 | -4.45906741 | -2.17934394 |
| C | -3.50727026 | 0.70395805  | -1.15253387 |
| N | -2.38914175 | 0.00008527  | 0.63309627  |
| C | -3.50719510 | -0.70388313 | -1.15254387 |
| C | -3.05338227 | 4.83710451  | 0.95913629  |
| C | -4.87989516 | 3.21224319  | 0.49120626  |
| C | -4.87985222 | -3.21208185 | 0.49107626  |
| C | -3.05338227 | -4.83694299 | 0.95919629  |
| C | 1.20602948  | 5.74061825  | -2.73012399 |
| C | -1.20591329 | 5.73986052  | -2.73217399 |
| C | 1.20591329  | -5.73986052 | -2.73217399 |
| C | -1.20602948 | -5.74061825 | -2.73012399 |
| C | -3.95164820 | 5.83898754  | 1.08513630  |
| C | -5.80555327 | 4.18691858  | 0.63013627  |
| C | -3.95162787 | -5.83893155 | 1.08455630  |
| C | -5.80548565 | -4.18685800 | 0.62942627  |
| C | 0.00008018  | 6.37622485  | -2.99940401 |
| C | -0.00008018 | -6.37622485 | -2.99940401 |
| C | -5.40094456 | 5.58087118  | 0.92635629  |



|    |             |             |             |
|----|-------------|-------------|-------------|
| C  | -5.40086381 | -5.58086758 | 0.92524629  |
| C  | -3.57564920 | 7.26701399  | 1.37626632  |
| C  | -7.28850208 | 3.95212205  | 0.52406626  |
| C  | -7.28841921 | -3.95213418 | 0.52298626  |
| C  | -3.57564635 | -7.26701727 | 1.37537633  |
| O  | -6.24582377 | 6.49537101  | 1.04202630  |
| O  | -6.24569608 | -6.49548923 | 1.04025630  |
| Br | 0.00018742  | 8.14972609  | -3.75900407 |
| Br | -0.00018742 | -8.14972609 | -3.75900407 |
| Br | -4.21028820 | -1.78846253 | -2.54041397 |
| Br | -4.21063838 | 1.78842066  | -2.54036397 |
| Br | -1.80568100 | -3.10313711 | 3.83233652  |
| Br | 1.80575161  | -3.10329779 | 3.83229651  |
| Br | 4.21063838  | -1.78842066 | -2.54036397 |
| Br | 4.21028820  | 1.78846253  | -2.54041397 |
| Br | -1.80575161 | 3.10329779  | 3.83229651  |
| Br | 1.80568100  | 3.10313711  | 3.83233652  |
| H  | 1.99300835  | -5.03422073 | 1.05807630  |
| H  | 5.18666294  | -2.19110516 | 0.30306624  |
| H  | 1.99303447  | 5.03399705  | 1.05860630  |
| H  | 5.18660486  | 2.19089830  | 0.30313624  |
| H  | 0.88898958  | -1.86133271 | -1.57080390 |
| H  | -0.88816118 | -1.86081115 | -1.57119390 |
| H  | -0.88898958 | 1.86133271  | -1.57080390 |
| H  | 0.88816118  | 1.86081115  | -1.57119390 |
| H  | -2.14888530 | 3.96295423  | -1.98792393 |
| H  | 2.14884956  | 3.96424196  | -1.98440393 |
| H  | 2.14888530  | -3.96295423 | -1.98792393 |
| H  | -2.14884956 | -3.96424196 | -1.98440393 |
| H  | -5.18666294 | 2.19110516  | 0.30306624  |

|   |             |             |             |
|---|-------------|-------------|-------------|
| H | -1.99300835 | 5.03422073  | 1.05807630  |
| H | -5.18660486 | -2.19089830 | 0.30313624  |
| H | -1.99303447 | -5.03399705 | 1.05860630  |
| H | -2.13858262 | 6.23996382  | -2.95499401 |
| H | 2.13876221  | 6.24124565  | -2.95146400 |
| H | 2.13858262  | -6.23996382 | -2.95499401 |
| H | -2.13876221 | -6.24124565 | -2.95146400 |
| H | 7.51124697  | -2.90801465 | 0.29031624  |
| H | 7.71473107  | -4.59593658 | -0.25361380 |
| H | 7.78239972  | -4.22504632 | 1.46378633  |
| H | 2.49312162  | -7.38264393 | 1.47031634  |
| H | 4.05599692  | -7.59905229 | 2.30385640  |
| H | 3.94166206  | -7.92442735 | 0.57944627  |
| H | 7.78259297  | 4.22560001  | 1.46239633  |
| H | 7.51118458  | 2.90792994  | 0.28971624  |
| H | 7.71433048  | 4.59558102  | -0.25517380 |
| H | 3.93993356  | 7.92401702  | 0.57739627  |
| H | 2.49326190  | 7.38234733  | 1.47131633  |
| H | 4.05763036  | 7.59988754  | 2.30181640  |
| H | -4.05599692 | 7.59905229  | 2.30385640  |
| H | -2.49312162 | 7.38264393  | 1.47031634  |
| H | -3.94166206 | 7.92442735  | 0.57944627  |
| H | -7.71473107 | 4.59593658  | -0.25361380 |
| H | -7.51124697 | 2.90801465  | 0.29031624  |
| H | -7.78239972 | 4.22504632  | 1.46378633  |
| H | -7.51118458 | -2.90792994 | 0.28971624  |
| H | -7.78259297 | -4.22560001 | 1.46239633  |
| H | -7.71433048 | -4.59558102 | -0.25517380 |
| H | -2.49326190 | -7.38234733 | 1.47131633  |
| H | -3.93993356 | -7.92401702 | 0.57739627  |

|   |             |             |            |
|---|-------------|-------------|------------|
| H | -4.05763036 | -7.59988754 | 2.30181640 |
| H | -1.92728135 | 0.00011910  | 1.53748634 |
| H | 1.92728135  | -0.00011910 | 1.53748634 |

**(c) Br<sub>8</sub>OxPBz<sub>4</sub>**

Total Energy: -34323.93889516 A.U.

|   |             |             |             |
|---|-------------|-------------|-------------|
| C | 1.23508416  | -3.33782266 | 0.03019114  |
| C | -3.33787526 | -1.23508555 | -0.03016886 |
| C | -1.23508320 | 3.33782612  | 0.02995114  |
| C | 3.33787076  | 1.23509740  | -0.03008886 |
| N | 2.25322005  | -1.04009712 | -0.28584888 |
| C | 2.06392322  | -2.20694017 | 0.46866118  |
| C | 3.02565530  | -0.12243951 | 0.43882118  |
| C | 2.72489173  | -2.00396887 | 1.67868127  |
| C | 3.31473003  | -0.72748533 | 1.65976127  |
| C | -0.12247282 | -3.02566800 | -0.43869889 |
| C | 2.20700211  | 2.06393354  | -0.46860889 |
| C | 4.63728917  | 1.70989912  | -0.05103886 |
| C | 1.70994707  | -4.63722508 | 0.05115115  |
| N | -1.04011037 | -2.25317194 | 0.28593116  |
| C | -0.72754494 | -3.31486727 | -1.65958899 |
| N | 1.04013139  | 2.25323622  | 0.28584116  |
| C | 2.00406609  | 2.72482955  | -1.67867899 |
| C | 4.92374746  | 3.12941237  | -0.20991887 |
| C | 5.77270973  | 0.80816397  | 0.08976115  |
| C | 0.80825304  | -5.77269041 | -0.08949886 |
| C | 3.12948622  | -4.92359488 | 0.20991116  |

|   |             |             |             |
|---|-------------|-------------|-------------|
| C | -2.00403686 | -2.72503441 | -1.67853899 |
| C | -2.20696802 | -2.06394429 | -0.46856889 |
| C | 0.72755158  | 3.31462382  | -1.65982899 |
| C | 0.12246716  | 3.02557169  | -0.43890889 |
| C | -1.01541584 | -2.16518724 | 1.78370128  |
| C | 1.01534955  | 2.16538559  | 1.78361128  |
| C | 6.18736133  | 3.60892778  | -0.21770887 |
| C | 7.04887628  | 1.25242743  | 0.06478115  |
| C | 1.25258608  | -7.04883554 | -0.06449886 |
| C | 3.60907959  | -6.18718183 | 0.21771116  |
| C | 7.34619341  | 2.69546967  | -0.08629887 |
| C | 2.69566807  | -7.34606715 | 0.08644115  |
| C | -1.58928620 | -3.42331121 | 2.42798133  |
| C | 1.58920685  | 3.42358458  | 2.42774133  |
| C | 6.52527630  | 5.07057023  | -0.34047888 |
| C | 8.24939504  | 0.35047392  | 0.16857115  |
| C | 0.35069844  | -8.24941885 | -0.16813887 |
| C | 5.07074795  | -6.52500832 | 0.34036117  |
| C | -3.02575081 | 0.12249949  | 0.43864117  |
| C | -2.06401327 | 2.20699177  | 0.46841118  |
| O | 8.52078878  | 3.12346496  | -0.10165887 |
| C | -4.63726677 | -1.70996522 | -0.05109886 |
| C | -1.70983464 | 4.63727728  | 0.05089115  |
| O | 3.12373000  | -8.52065490 | 0.10181115  |
| C | -0.75496228 | -4.49176473 | 2.77978136  |
| C | -2.96522940 | -3.54273789 | 2.66339134  |
| C | 2.96517381  | 3.54315802  | 2.66293135  |
| C | 0.75483227  | 4.49196931  | 2.77960136  |
| C | -3.31493839 | 0.72762696  | 1.65950127  |
| N | -2.25324969 | 1.04009260  | -0.28602888 |

|    |             |             |             |
|----|-------------|-------------|-------------|
| C  | -2.72508332 | 2.00412140  | 1.67840127  |
| C  | -4.92363950 | -3.12951822 | -0.20973887 |
| C  | -5.77273211 | -0.80827119 | 0.08949115  |
| C  | -3.12933328 | 4.92380475  | 0.20964116  |
| C  | -0.80801685 | 5.77264422  | -0.08975887 |
| C  | -1.28283146 | -5.65368395 | 3.34378140  |
| C  | -3.49444235 | -4.70400476 | 3.22638139  |
| C  | 3.49434641  | 4.70454180  | 3.22575139  |
| C  | 1.28265817  | 5.65399162  | 3.34341140  |
| C  | -6.18722644 | -3.60911159 | -0.21746888 |
| C  | -7.04888565 | -1.25260969 | 0.06454115  |
| C  | -1.25219398 | 7.04884316  | -0.06470886 |
| C  | -3.60877620 | 6.18745388  | 0.21749116  |
| C  | -2.65076060 | -5.75569478 | 3.56153141  |
| C  | 2.65060853  | 5.75617141  | 3.56093142  |
| C  | -7.34609789 | -2.69570298 | -0.08626886 |
| C  | -2.69524091 | 7.34624077  | 0.08627115  |
| C  | -6.52505589 | -5.07079379 | -0.33996888 |
| C  | -8.24946891 | -0.35072205 | 0.16811115  |
| C  | -5.07040112 | 6.52545188  | 0.34013117  |
| C  | -0.35017168 | 8.24931127  | -0.16832887 |
| O  | -8.52069406 | -3.12377037 | -0.10157887 |
| O  | -3.12316370 | 8.52087144  | 0.10171115  |
| Br | -3.38222451 | -7.36265267 | 4.33969147  |
| Br | 3.38203248  | 7.36328229  | 4.33881147  |
| C  | -2.16530980 | 1.01535695  | -1.78378899 |
| C  | 2.16534566  | -1.01546203 | -1.78361900 |
| C  | 3.42354427  | -1.58935538 | -2.42772905 |
| C  | 3.54292944  | -2.96528981 | -2.66320906 |
| C  | 4.49210011  | -0.75506030 | -2.77925907 |

|    |             |             |             |
|----|-------------|-------------|-------------|
| C  | 4.70428770  | -3.49451483 | -3.22600910 |
| C  | 5.65411074  | -1.28294155 | -3.34303911 |
| C  | 5.75609933  | -2.65087322 | -3.56086913 |
| C  | -3.42348990 | 1.58916689  | -2.42800904 |
| C  | -4.49188846 | 0.75479523  | -2.77984907 |
| C  | -3.54301636 | 2.96511671  | -2.66331906 |
| C  | -5.65385250 | 1.28262328  | -3.34378911 |
| C  | -4.70431966 | 3.49429399  | -3.22626910 |
| C  | -5.75596312 | 2.65055904  | -3.56145913 |
| Br | 7.36318719  | -3.38237181 | -4.33871919 |
| Br | -7.36298256 | 3.38197091  | -4.33953919 |
| Br | -2.78061845 | 3.17889360  | 3.16711138  |
| Br | -4.26519760 | -0.03063775 | 3.11562138  |
| Br | -0.03080393 | 4.26469262  | -3.11602909 |
| Br | 3.17878101  | 2.78019610  | -3.16741910 |
| Br | 4.26481891  | 0.03093098  | 3.11591138  |
| Br | 2.78030855  | -3.17865104 | 3.16746138  |
| Br | -3.17873987 | -2.78058415 | -3.16729910 |
| Br | 0.03080571  | -4.26513017 | -3.11565910 |
| H  | 4.08072670  | 3.80542516  | -0.27890888 |
| H  | 5.56197018  | -0.25053706 | 0.17421115  |
| H  | -0.25047098 | -5.56202553 | -0.17384887 |
| H  | 3.80545789  | -4.08052930 | 0.27879116  |
| H  | 1.59489168  | 1.28556375  | 2.06179130  |
| H  | -0.02376095 | 2.01719192  | 2.07724130  |
| H  | -1.59502462 | -1.28537301 | 2.06174130  |
| H  | 0.02366230  | -2.01690725 | 2.07739130  |
| H  | -3.62823261 | -2.72487483 | 2.41898133  |
| H  | 0.31211155  | -4.41785839 | 2.62379134  |
| H  | 3.62822184  | 2.72533608  | 2.41850133  |

|   |             |             |             |
|---|-------------|-------------|-------------|
| H | -0.31227624 | 4.41793298  | 2.62377134  |
| H | -5.56207268 | 0.25046120  | 0.17374116  |
| H | -4.08058229 | -3.80549534 | -0.27857888 |
| H | -3.80541779 | 4.08082081  | 0.27847116  |
| H | 0.25068632  | 5.56184641  | -0.17415887 |
| H | -4.55758020 | -4.78849877 | 3.40622140  |
| H | -0.63221245 | -6.47437368 | 3.61371142  |
| H | 4.55749379  | 4.78914944  | 3.40543140  |
| H | 0.63198596  | 6.47463477  | 3.61336142  |
| H | 7.95363147  | -0.69713031 | 0.26363116  |
| H | 8.85759105  | 0.63430870  | 1.03518122  |
| H | 8.88770838  | 0.46707510  | -0.71465891 |
| H | 5.62366341  | 5.68336175  | -0.41566889 |
| H | 7.14998909  | 5.23748171  | -1.22558895 |
| H | 7.11357672  | 5.39680856  | 0.52470118  |
| H | 5.39693054  | -7.11333314 | -0.52483890 |
| H | 5.68350092  | -5.62337289 | 0.41545117  |
| H | 5.23778474  | -7.14967529 | 1.22547123  |
| H | 0.46745260  | -8.88769218 | 0.71509120  |
| H | -0.69693969 | -7.95371313 | -0.26307888 |
| H | 0.63446112  | -8.85761401 | -1.03477894 |
| H | -7.14979028 | -5.23791028 | -1.22502895 |
| H | -5.62342041 | -5.68354675 | -0.41506889 |
| H | -7.11332457 | -5.39691593 | 0.52529118  |
| H | -8.85768593 | -0.63445121 | 1.03474122  |
| H | -7.95376319 | 0.69691608  | 0.26301116  |
| H | -8.88772044 | -0.46750973 | -0.71512891 |
| H | -5.68326438 | 5.62387582  | 0.41521117  |
| H | -5.39652503 | 7.11381485  | -0.52505890 |
| H | -5.23737125 | 7.15012646  | 1.22525123  |

|   |             |             |             |
|---|-------------|-------------|-------------|
| H | 0.69742632  | 7.95348394  | -0.26332888 |
| H | -0.46679039 | 8.88754153  | 0.71495120  |
| H | -0.63389460 | 8.85759200  | -1.03490893 |
| H | -1.28552832 | 1.59501601  | -2.06187902 |
| H | -2.01698538 | -0.02371612 | -2.07746902 |
| H | 1.28555364  | -1.59506827 | -2.06171902 |
| H | 2.01710172  | 0.02361573  | -2.07736902 |
| H | 2.72497245  | -3.62825873 | -2.41901904 |
| H | 4.41820214  | 0.31201899  | -2.62323906 |
| H | 4.78874859  | -4.55763846 | -3.40591912 |
| H | 6.47488894  | -0.63234845 | -3.61274913 |
| H | -4.41790455 | -0.31228775 | -2.62394906 |
| H | -2.72518059 | 3.62816181  | -2.41888904 |
| H | -6.47451201 | 0.63197622  | -3.61375913 |
| H | -4.78887195 | 4.55742969  | -3.40605912 |
